# Supplementary material
Source: Royal Society of Chemistry journal article supplement (doi:10.1039/d6ma00263c)
Supplement: d6ma00263c1.pdf [file d6ma00263c1.pdf]

## Unblocking the potential of a Novel 2D Vanadium Boro Carbide and VBC/graphene heterostructure as an Efficient Host for Li-Ion Batteries

Liaqat Ali <sup>a</sup>, Javed Rehman <sup>b\*</sup>, Chong-Wen Zhou <sup>a,\*</sup>

<sup>a</sup> Combustion Chemistry Centre, School of Biological and Chemical Sciences, MaREI, Ryan Institute, University of Galway, Galway H91 TK33, Ireland

<sup>b</sup> State Key Laboratory of Metastable Materials Science and Technology, School of Materials Science and Engineering, Yanshan University, Qinhuangdao 066004, China

\* Corresponding authors:

C. W. Zhou ([chongwen.zhou@universityofgalway.ie](mailto:chongwen.zhou@universityofgalway.ie)) and J. Rehman ([javedk15@ysu.edu.cn](mailto:javedk15@ysu.edu.cn))

### Supporting Information

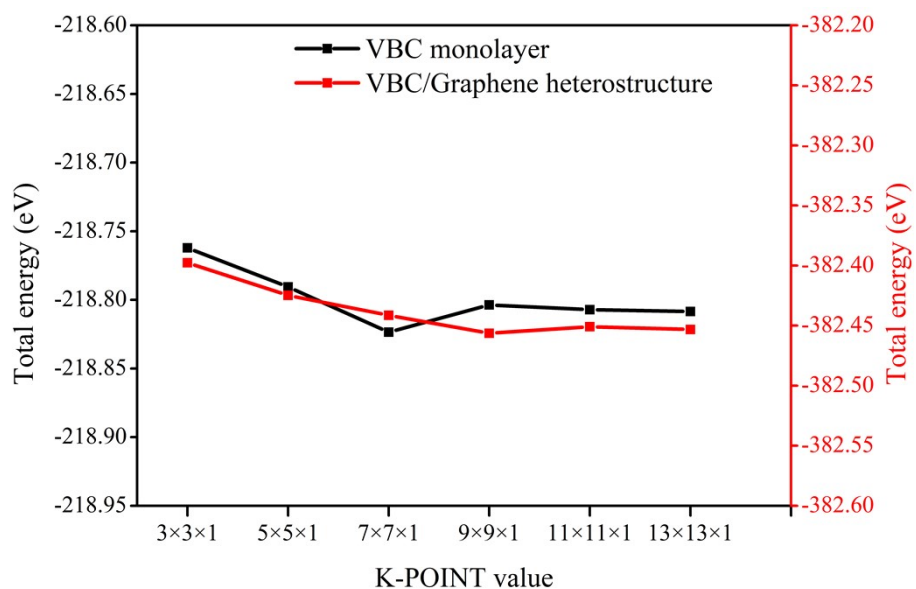

Figure 1. K-point value versus total energy of the VBC monolayer and VBC/graphene heterostructure.

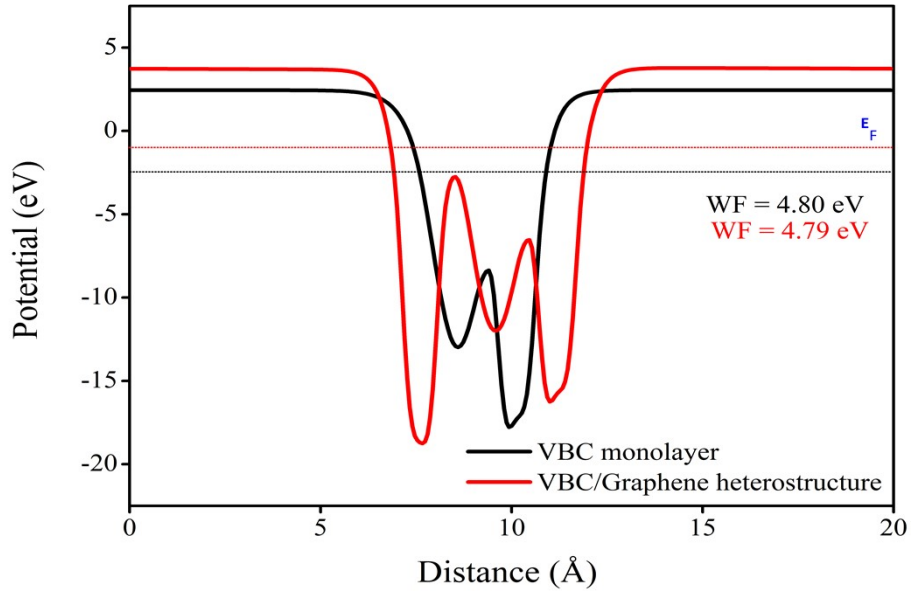

Figure 2. Work function of the pristine VBC monolayer and VBC/graphene heterostructure.

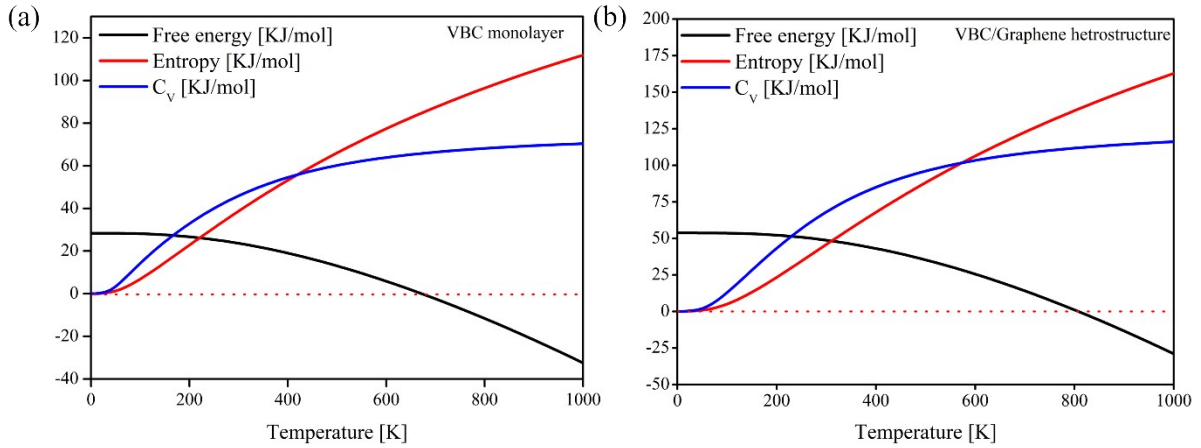

Figure 3. Thermodynamic quantities: Gibbs free energy ( $F$ ), entropy, and heat capacity at constant volume ( $C_v$ ) as functions of temperature (K) of the VBC monolayer and VBC/graphene heterostructure.

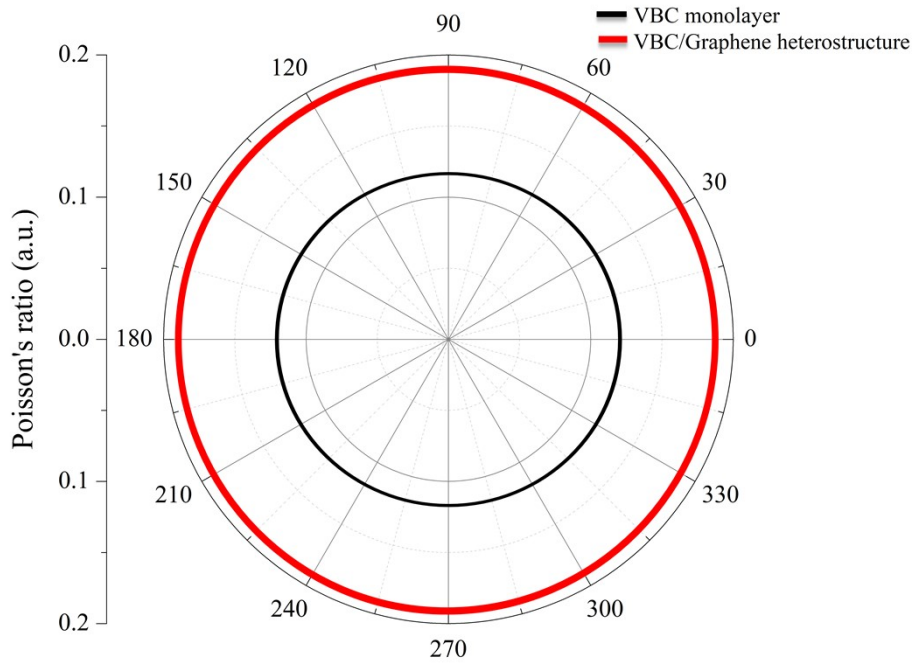

Figure 4. Poisson's ratio of the VBC monolayer and VBC/graphene heterostructure.

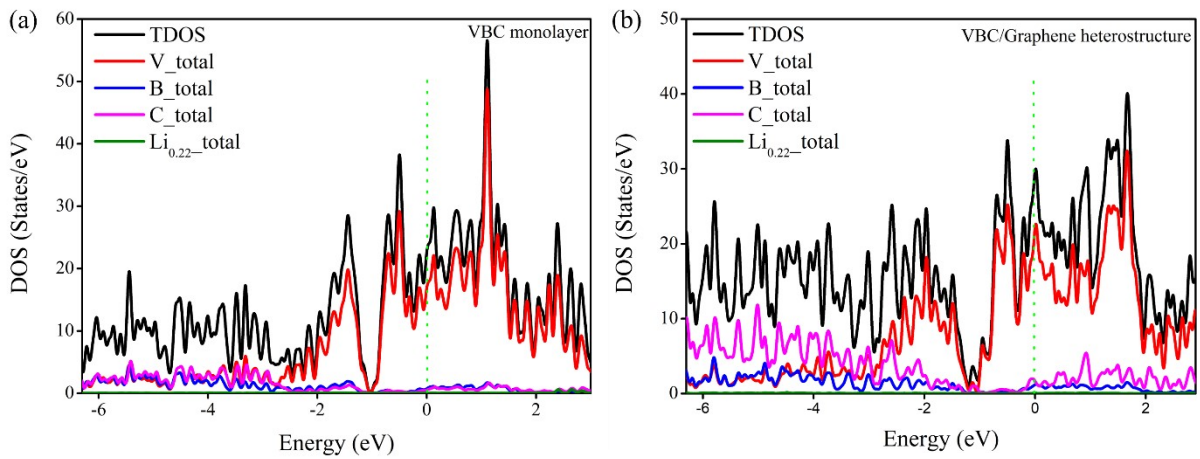

Figure 5. Total and partial density of state of the Li-adsorbed VBC monolayer and VBC/graphene heterostructure.

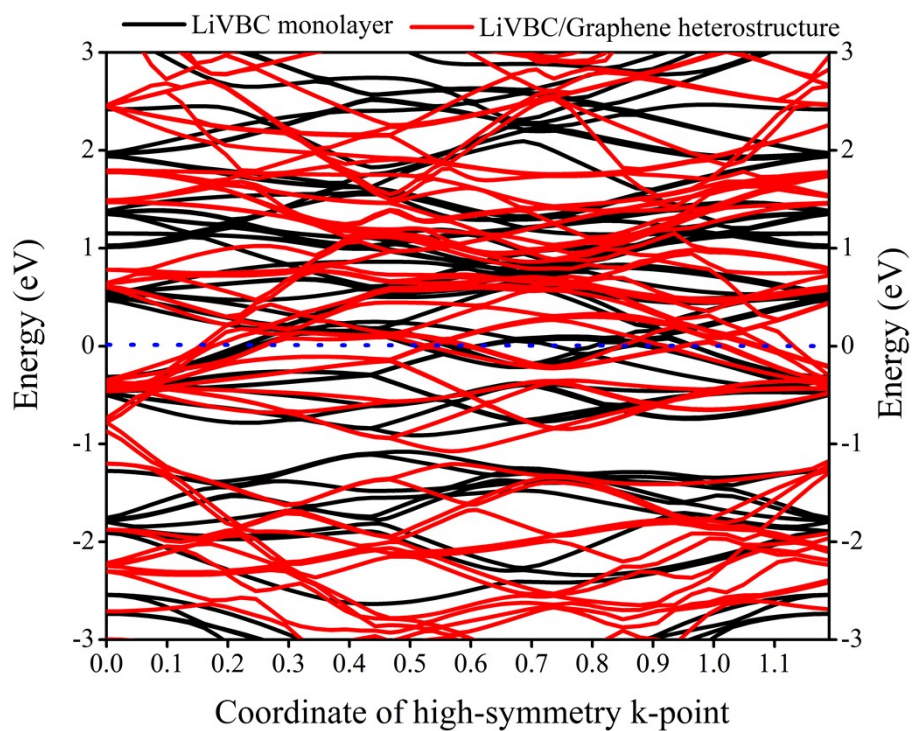

Figure 6. Electronic band structure of the Li-adsorbed VBC monolayer and VBC/graphene heterostructure.

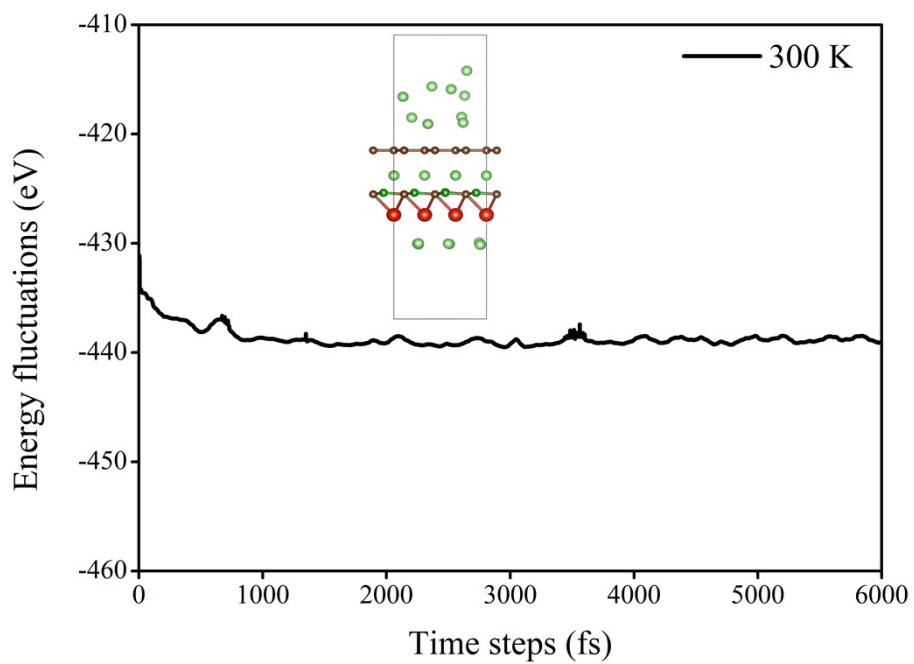

Figure 7. AIMD simulations of the VBC/graphene heterostructure at 300 K.

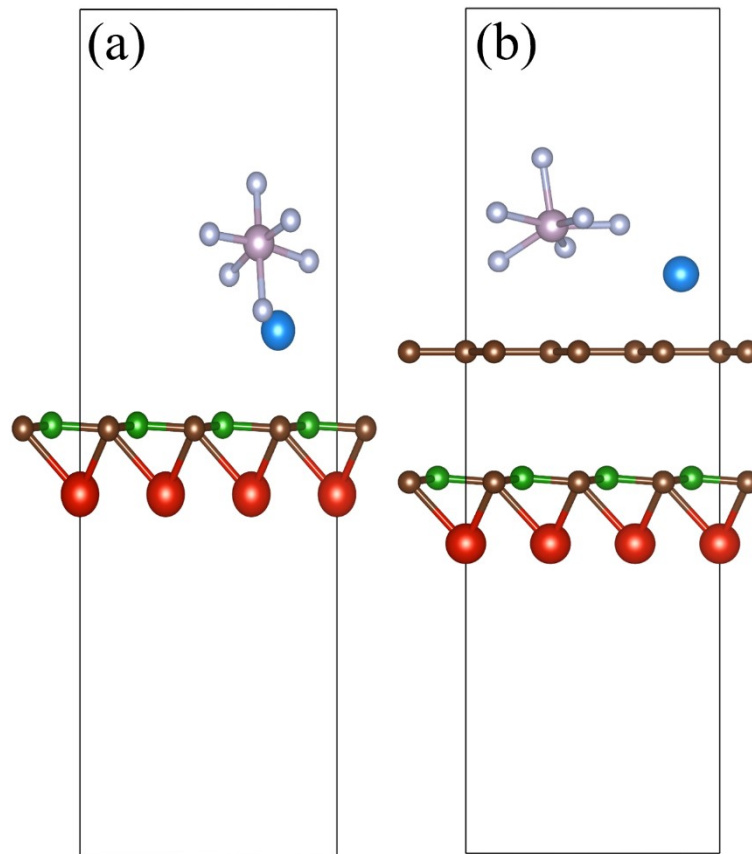

Figure 8. The most favourable adsorption configuration of the (a) VBC monolayer and (b) VBC/graphene heterostructure with adsorbed  $\text{LiPF}_6$ .
